# Supplementary material
Source: Royal Society of Chemistry journal article supplement (doi:10.1039/d6cp01016d)
Supplement: d6cp01016d1.pdf [file d6cp01016d1.pdf]

## Supplementary Information

### Osmotic Coefficient and Mean Ionic Activity Coefficient of Supersaturated Ammonium Nitrate Solutions Measured by Laser Trapping and Raman Spectroscopy

Kento Kuniyoshi<sup>a</sup> and Shoji Ishizaka<sup>a,\*</sup>

<sup>a</sup> *Graduate School of Advanced Science and Engineering, Hiroshima University, 1-3-1  
Kagamiyama, Higashi-Hiroshima 739-8526, Japan*

\* Corresponding author:

Shoji Ishizaka – ORCID ID: 0000-0001-9866-5809

Graduate School of Advanced Science and Engineering, Hiroshima University, 1-3-1  
Kagamiyama, Higashi-Hiroshima 739-8526, Japan

E-mail: [ishizaka@hiroshima-u.ac.jp](mailto:ishizaka@hiroshima-u.ac.jp)

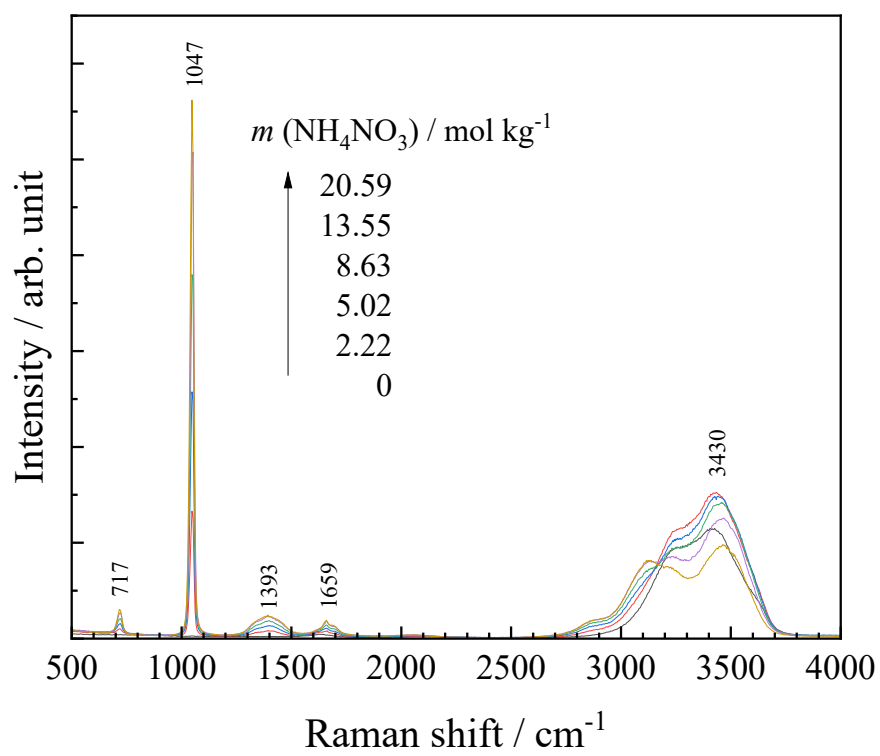

**Fig. S1** Concentration dependence of the Raman spectra of bulk aqueous  $\text{NH}_4\text{NO}_3$  solutions.

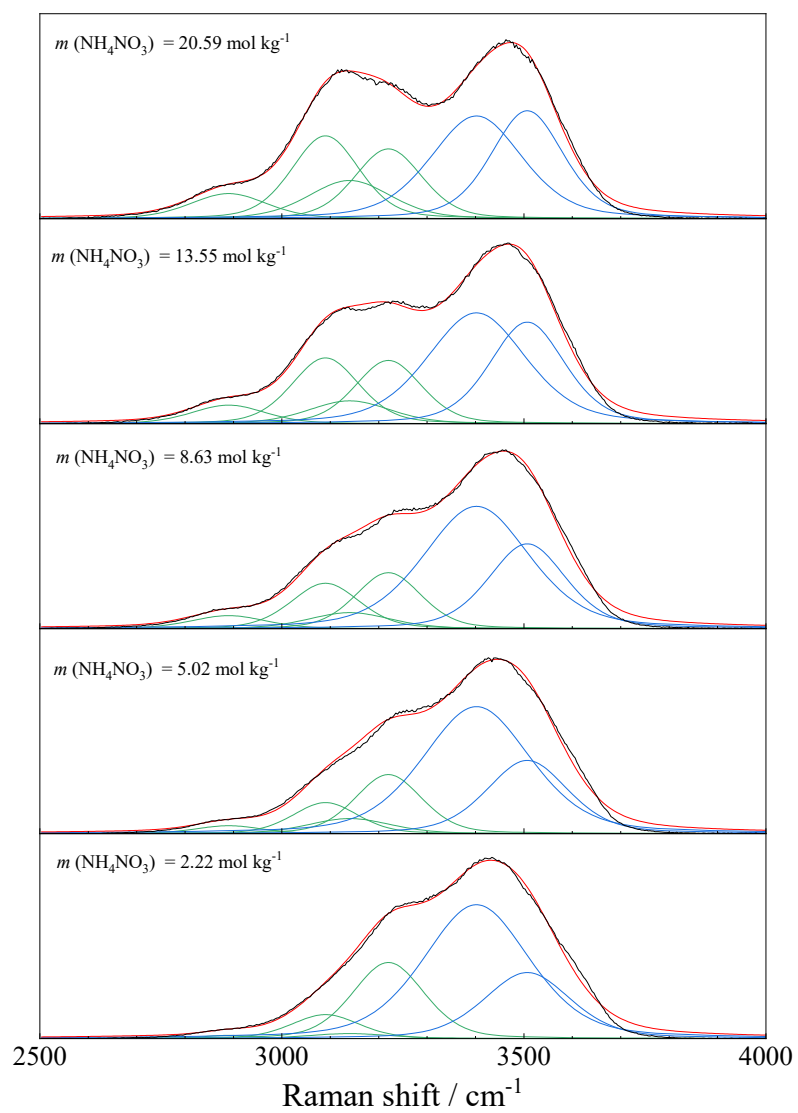

**Fig. S2** Peak-deconvolution fitting of the Raman spectra (2500–4000  $\text{cm}^{-1}$ ) of bulk aqueous  $\text{NH}_4\text{NO}_3$  solutions, with  $x_c$  (center wavenumbers) at 2890, 3090, 3140, 3220, 3402, and 3507  $\text{cm}^{-1}$ .

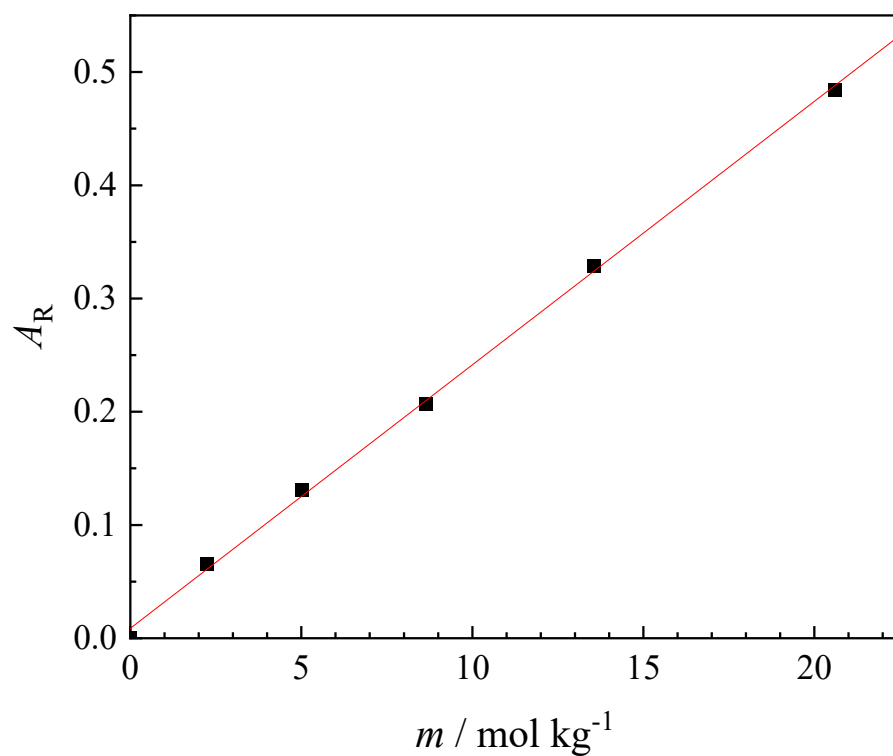

**Fig. S3** Dependence of the area ratio ( $A_R$ ), defined as the peak area at  $1047 \text{ cm}^{-1}$  relative to the sum of the peak areas at  $3402$  and  $3507 \text{ cm}^{-1}$ , on the molality of  $\text{NH}_4\text{NO}_3$ . The solid line shows a linear least-squares regression fit (slope =  $0.023 \pm 0.001 \text{ kg mol}^{-1}$ ; intercept =  $0.01 \pm 0.01$ ;  $R^2 = 0.999$ ).

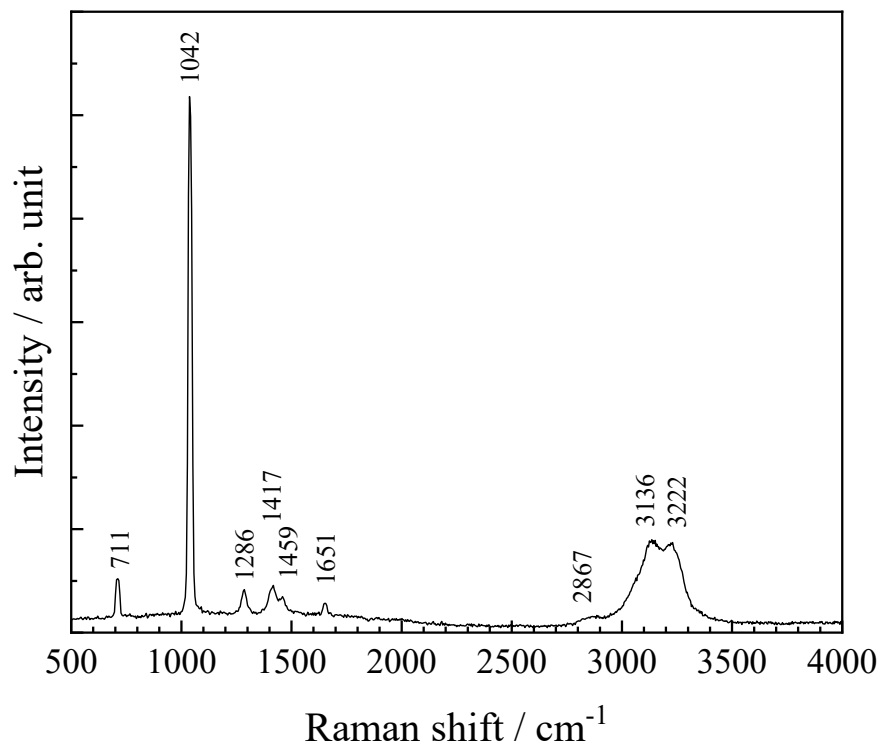

**Fig. S4** Raman spectrum of NH<sub>4</sub>NO<sub>3</sub> crystals.

**Table S1.** Raman-spectroscopy-derived and image-based droplet-volume-interpolated thermodynamic data for the optically levitated aqueous  $\text{NH}_4\text{NO}_3$  droplet corresponding to the solid-circle symbols in Figs. 5–7, measured at  $25.0 \pm 0.5$  °C and ambient pressure ( $\approx 1$  atm).

| $a_w$ | $V / 10^{-12}$<br>L | $n / 10^{-11}$<br>mol | $C_s$<br>mol L <sup>-1</sup> | $d$<br>g cm <sup>-3</sup> | $m$<br>mol kg <sup>-1</sup> | $x_1$ | $\phi$ | $\gamma_{\pm}$ |
|-------|---------------------|-----------------------|------------------------------|---------------------------|-----------------------------|-------|--------|----------------|
| 0.850 | 3.22                | 1.66                  | 5.16                         | 1.153                     | <b><u>7.0</u></b>           | 0.201 | 0.644  | 0.264          |
| 0.840 | 3.02                | 1.66                  | 5.50                         | 1.163                     | 7.6                         | 0.215 | 0.637  | 0.255          |
| 0.836 | 2.93                | 1.66                  | 5.69                         | 1.168                     | 8.0                         | 0.223 | 0.621  | 0.246          |
| 0.832 | 2.93                | 1.66                  | 5.69                         | 1.168                     | 8.0                         | 0.223 | 0.638  | 0.250          |
| 0.811 | 2.62                | 1.66                  | 6.35                         | 1.187                     | 9.4                         | 0.252 | 0.619  | 0.231          |
| 0.795 | 2.47                | 1.66                  | 6.73                         | 1.198                     | 10.2                        | 0.269 | 0.624  | 0.225          |
| 0.785 | 2.36                | 1.66                  | 7.06                         | 1.207                     | 11.0                        | 0.284 | 0.611  | 0.216          |
| 0.773 | 2.25                | 1.66                  | 7.40                         | 1.217                     | 11.9                        | 0.299 | 0.601  | 0.207          |
| 0.722 | 1.97                | 1.66                  | 8.41                         | 1.245                     | <b><u>14.7</u></b>          | 0.346 | 0.615  | 0.193          |
| 0.699 | 1.80                | 1.66                  | 9.26                         | 1.268                     | 17.6                        | 0.388 | 0.565  | 0.171          |
| 0.680 | 1.73                | 1.66                  | 9.66                         | 1.278                     | 19.0                        | 0.406 | 0.563  | 0.165          |
| 0.673 | 1.70                | 1.66                  | 9.76                         | 1.282                     | 20.0                        | 0.413 | 0.550  | 0.159          |
| 0.665 | 1.66                | 1.66                  | 10.03                        | 1.289                     | 20.6                        | 0.426 | 0.550  | 0.157          |
| 0.647 | 1.64                | 1.66                  | 10.11                        | 1.245                     | <b><u>21.0</u></b>          | 0.431 | 0.575  | 0.160          |
| 0.593 | 1.45                | 1.66                  | 11.48                        | 1.328                     | 28.0                        | 0.503 | 0.518  | 0.132          |
| 0.559 | 1.37                | 1.66                  | 12.16                        | 1.346                     | 32.6                        | 0.540 | 0.495  | 0.120          |
| 0.543 | 1.33                | 1.66                  | 12.48                        | 1.355                     | 35.1                        | 0.558 | 0.483  | 0.114          |
| 0.534 | 1.32                | 1.66                  | 12.66                        | 1.360                     | 36.5                        | 0.568 | 0.477  | 0.111          |
| 0.528 | 1.32                | 1.66                  | 12.66                        | 1.360                     | 36.5                        | 0.568 | 0.486  | 0.112          |
| 0.523 | 1.31                | 1.66                  | 12.71                        | 1.361                     | <b><u>37.0</u></b>          | 0.571 | 0.486  | 0.111          |
| 0.503 | 1.28                | 1.66                  | 13.03                        | 1.369                     | 39.9                        | 0.590 | 0.478  | 0.106          |
| 0.473 | 1.22                | 1.66                  | 13.59                        | 1.384                     | 45.9                        | 0.623 | 0.453  | 0.096          |
| 0.467 | 1.22                | 1.66                  | 13.63                        | 1.385                     | 46.3                        | 0.625 | 0.456  | 0.096          |
| 0.462 | 1.20                | 1.66                  | 13.82                        | 1.390                     | 48.7                        | 0.637 | 0.440  | 0.092          |
| 0.459 | 1.20                | 1.66                  | 13.82                        | 1.390                     | 48.7                        | 0.637 | 0.444  | 0.092          |
| 0.450 | 1.19                | 1.66                  | 14.02                        | 1.395                     | 51.2                        | 0.649 | 0.433  | 0.089          |
| 0.441 | 1.19                | 1.66                  | 14.03                        | 1.396                     | 51.4                        | 0.649 | 0.442  | 0.089          |
| 0.434 | 1.17                | 1.66                  | 14.22                        | 1.401                     | 54.1                        | 0.661 | 0.428  | 0.086          |
| 0.429 | 1.17                | 1.66                  | 14.25                        | 1.402                     | 54.5                        | 0.663 | 0.431  | 0.085          |
| 0.426 | 1.15                | 1.65                  | 14.35                        | 1.405                     | <b><u>56.0</u></b>          | 0.669 | 0.423  | 0.083          |

|       |      |      |       |       |             |       |       |       |
|-------|------|------|-------|-------|-------------|-------|-------|-------|
| 0.396 | 1.13 | 1.65 | 14.61 | 1.411 | 60.5        | 0.685 | 0.425 | 0.080 |
| 0.383 | 1.12 | 1.65 | 14.79 | 1.416 | 63.7        | 0.696 | 0.418 | 0.077 |
| 0.360 | 1.10 | 1.65 | 15.06 | 1.424 | <b>69.0</b> | 0.713 | 0.411 | 0.073 |
| 0.319 | 1.07 | 1.65 | 15.46 | 1.433 | 78.9        | 0.740 | 0.402 | 0.067 |
| 0.306 | 1.05 | 1.65 | 15.70 | 1.440 | 85.7        | 0.755 | 0.384 | 0.062 |
| 0.287 | 1.05 | 1.65 | 15.73 | 1.441 | 86.8        | 0.758 | 0.399 | 0.063 |
| 0.270 | 1.02 | 1.63 | 15.96 | 1.447 | <b>94.0</b> | 0.772 | 0.387 | 0.059 |
| 0.222 | 1.00 | 1.63 | 16.23 | 1.454 | 105         | 0.791 | 0.398 | 0.056 |
| 0.201 | 0.99 | 1.63 | 16.49 | 1.460 | 117         | 0.809 | 0.381 | 0.051 |
| 0.168 | 0.96 | 1.61 | 16.82 | 1.468 | <b>138</b>  | 0.833 | 0.359 | 0.045 |
| 0.142 | 0.94 | 1.61 | 17.12 | 1.477 | 161         | 0.853 | 0.336 | 0.040 |
| 0.125 | 0.94 | 1.61 | 17.12 | 1.477 | 161         | 0.853 | 0.358 | 0.041 |
| 0.102 | 0.93 | 1.61 | 17.39 | 1.484 | 189         | 0.872 | 0.335 | 0.036 |
| 0.079 | 0.91 | 1.60 | 17.57 | 1.488 | <b>215</b>  | 0.886 | 0.328 | 0.033 |

$a_w$ ; the activity of water.

$V$  (L); the droplet volume determined by image analysis, assuming a spherical droplet.

$n$  (mol); the amount of  $\text{NH}_4\text{NO}_3$  in the droplet.

$C_s$  ( $\text{mol L}^{-1}$ ); The molar concentration of  $\text{NH}_4\text{NO}_3$  in the droplet.

$d$  ( $\text{g cm}^{-3}$ ); the density of the aqueous  $\text{NH}_4\text{NO}_3$  solution, calculated using the parameterization reported by Clegg *et al.* (*J. Phys. Chem A*, 2011, 115, 3393-346).

$m$  ( $\text{mol kg}^{-1}$ ); the molality of  $\text{NH}_4\text{NO}_3$ .

$x_i$ ; the total ionic mole fraction calculated by Eq. (3) in the main text.

$\phi$ ; the osmotic coefficient, calculated from the measured water activity  $a_w$  using Eq. (7).

$\gamma_{\pm}$ ; the mean molal ionic activity coefficient, obtained from numerical integration of the Gibbs–Duhem equation using Eq. (10).

The molality values shown in **\*\*bold and underlined text\*\*** correspond to values directly estimated from Raman spectral deconvolution analysis and are identical to those listed in Table 1 of the main text.

All other molality values were obtained by interpolation based on image-derived droplet volume changes between successive Raman measurements, followed by conversion from molar concentration to molality using the corresponding density values.

**Table S2.** Thermodynamic properties of additional optically levitated aqueous  $\text{NH}_4\text{NO}_3$  droplets corresponding to the star symbols in Figs. 5–7, measured at  $25.0 \pm 0.5$  °C and ambient pressure ( $\approx 1$  atm)..

| $a_w$ | $V / 10^{-12}$<br>L | $n / 10^{-11}$<br>mol | $C_s$<br>mol L <sup>-1</sup> | $d$<br>g cm <sup>-3</sup> | $m$<br>mol kg <sup>-1</sup> | $x_1$ | $\phi$ | $\gamma_{\pm}$ |
|-------|---------------------|-----------------------|------------------------------|---------------------------|-----------------------------|-------|--------|----------------|
| 0.832 | 4.00                | 2.28                  | 5.70                         | 1.168                     | 8.0                         | 0.224 | 0.638  | 0.248          |
| 0.828 | 3.94                | 2.28                  | 5.79                         | 1.171                     | 8.2                         | 0.228 | 0.640  | 0.247          |
| 0.826 | 3.88                | 2.28                  | 5.88                         | 1.173                     | 8.4                         | 0.232 | 0.635  | 0.243          |
| 0.815 | 3.65                | 2.28                  | 6.25                         | 1.184                     | 9.2                         | 0.248 | 0.620  | 0.232          |
| 0.804 | 3.48                | 2.28                  | 6.56                         | 1.193                     | 9.8                         | 0.261 | 0.616  | 0.225          |
| 0.789 | –                   | –                     | –                            | –                         | <b><u>9.5</u></b>           | 0.256 | –      | –              |
| 0.789 | 3.21                | 2.28                  | 7.11                         | 1.208                     | 11.1                        | 0.286 | 0.591  | 0.209          |
| 0.788 | 3.16                | 2.28                  | 7.23                         | 1.212                     | 11.4                        | 0.292 | 0.579  | 0.204          |
| 0.766 | 2.95                | 2.28                  | 7.73                         | 1.226                     | 12.7                        | 0.314 | 0.581  | 0.195          |
| 0.748 | 2.76                | 2.28                  | 8.27                         | 1.241                     | 14.3                        | 0.340 | 0.564  | 0.183          |
| 0.720 | 2.62                | 2.28                  | 8.72                         | 1.253                     | 15.7                        | 0.361 | 0.581  | 0.178          |
| 0.710 | 2.48                | 2.28                  | 9.19                         | 1.266                     | 17.3                        | 0.384 | 0.549  | 0.165          |
| 0.670 | 2.27                | 2.28                  | 10.06                        | 1.290                     | 20.8                        | 0.428 | 0.535  | 0.150          |
| 0.651 | 2.14                | 2.28                  | 10.64                        | 1.306                     | 23.4                        | 0.458 | 0.508  | 0.138          |
| 0.625 | 2.07                | 2.28                  | 11.05                        | 1.317                     | 25.6                        | 0.480 | 0.510  | 0.132          |
| 0.569 | 1.80                | 2.18                  | 12.09                        | 1.345                     | 32.1                        | 0.536 | 0.487  | 0.115          |
| 0.542 | 1.77                | 2.18                  | 12.34                        | 1.351                     | 33.9                        | 0.550 | 0.501  | 0.114          |
| 0.523 | 1.71                | 2.18                  | 12.72                        | 1.361                     | <b><u>37.1</u></b>          | 0.572 | 0.485  | 0.107          |
| 0.510 | 1.66                | 2.18                  | 13.11                        | 1.371                     | 40.7                        | 0.594 | 0.460  | 0.099          |
| 0.456 | 1.56                | 2.17                  | 13.88                        | 1.392                     | 49.4                        | 0.640 | 0.441  | 0.088          |
| 0.434 | 1.50                | 2.13                  | 14.21                        | 1.401                     | 54.0                        | 0.660 | 0.429  | 0.082          |
| 0.367 | 1.38                | 2.06                  | 14.97                        | 1.421                     | 67.3                        | 0.708 | 0.413  | 0.071          |
| 0.338 | 1.32                | 2.02                  | 15.34                        | 1.430                     | 75.7                        | 0.732 | 0.398  | 0.065          |
| 0.315 | 1.29                | 2.02                  | 15.68                        | 1.439                     | 85.2                        | 0.754 | 0.376  | 0.060          |
| 0.252 | 1.26                | 2.02                  | 16.03                        | 1.448                     | 97.2                        | 0.778 | 0.394  | 0.056          |
| 0.233 | 1.20                | 1.97                  | 16.36                        | 1.457                     | 111                         | 0.800 | 0.364  | 0.050          |
| 0.228 | 1.18                | 1.93                  | 16.40                        | 1.458                     | <b><u>113</u></b>           | 0.802 | 0.364  | 0.049          |
| 0.169 | 1.15                | 1.93                  | 16.78                        | 1.468                     | 134                         | 0.829 | 0.367  | 0.044          |
| 0.120 | 1.12                | 1.93                  | 17.17                        | 1.478                     | 166                         | 0.857 | 0.355  | 0.038          |

Definitions of  $a_w$ ,  $V$ ,  $n$ ,  $C_s$ ,  $d$ ,  $m$ ,  $x_1$ ,  $\phi$ , and  $\gamma_{\pm}$  are identical to those given in Table S1.

The molality values shown in **\*\*bold and underlined text\*\*** correspond to values directly estimated from Raman spectral deconvolution analysis.

For molalities  $m \leq 25.6 \text{ mol kg}^{-1}$ , only a single Raman spectrum was available at each concentration, and the resulting molality values were systematically lower than the corresponding literature values. Therefore, in this concentration range, the molality  $m$  was estimated with reference to the E-AIM model.

In the concentration range between  $m = 37.1$  and  $113 \text{ mol kg}^{-1}$ , the spacing of molality values directly obtained from Raman spectroscopy was relatively large. Therefore, the amount of solute  $n$  in this range was estimated with reference to the solid-circle data listed in Table S1.

The final two data points ( $m = 134$  and  $166 \text{ mol kg}^{-1}$ ) were obtained by extrapolation rather than interpolation. These values lie within the molality range covered by the solid-circle data listed in Table S1, and their magnitudes are consistent with the corresponding thermodynamic trends observed therein. On this basis, the extrapolated values were considered to be physically reasonable and are included here.

**Table S3.** Thermodynamic properties of additional optically levitated aqueous  $\text{NH}_4\text{NO}_3$  droplets corresponding to the diamond symbols in Figs. 5–7, measured at  $25.0 \pm 0.5$  °C and ambient pressure ( $\approx 1$  atm)..

| $a_w$ | $V / 10^{-12}$<br>L | $n / 10^{-11}$<br>mol | $C_s$<br>mol L <sup>-1</sup> | $d$<br>g cm <sup>-3</sup> | $m$<br>mol kg <sup>-1</sup> | $x_1$ | $\phi$ | $\gamma_{\pm}$ |
|-------|---------------------|-----------------------|------------------------------|---------------------------|-----------------------------|-------|--------|----------------|
| 0.682 | 2.48                | 2.48                  | 9.99                         | 1.288                     | <b><u>20.5</u></b>          | 0.424 | 0.519  | 0.153          |
| 0.658 | 2.44                | 2.48                  | 10.17                        | 1.293                     | 21.2                        | 0.434 | 0.547  | 0.155          |
| 0.632 | 2.31                | 2.48                  | 10.74                        | 1.308                     | 23.9                        | 0.463 | 0.532  | 0.144          |
| 0.598 | 2.19                | 2.48                  | 11.30                        | 1.323                     | <b><u>27.0</u></b>          | 0.493 | 0.529  | 0.136          |
| 0.561 | 2.07                | 2.47                  | 11.96                        | 1.341                     | 31.2                        | 0.529 | 0.515  | 0.125          |
| 0.529 | 1.95                | 2.47                  | 12.67                        | 1.360                     | 36.6                        | 0.569 | 0.483  | 0.112          |
| 0.513 | 1.88                | 2.45                  | 13.06                        | 1.370                     | 40.2                        | 0.592 | 0.460  | 0.104          |
| 0.501 | 1.88                | 2.41                  | 12.86                        | 1.365                     | <b><u>38.3</u></b>          | 0.580 | 0.501  | 0.111          |
| 0.444 | 1.66                | 2.35                  | 14.13                        | 1.398                     | 52.8                        | 0.656 | 0.427  | 0.087          |
| 0.419 | 1.63                | 2.35                  | 14.42                        | 1.406                     | 57.3                        | 0.674 | 0.422  | 0.082          |
| 0.409 | 1.60                | 2.32                  | 14.53                        | 1.409                     | 59.1                        | 0.681 | 0.420  | 0.081          |
| 0.341 | 1.50                | 2.29                  | 15.27                        | 1.429                     | 74.2                        | 0.728 | 0.403  | 0.069          |
| 0.326 | 1.47                | 2.26                  | 15.40                        | 1.432                     | 77.3                        | 0.736 | 0.403  | 0.068          |
| 0.309 | 1.41                | 2.18                  | 15.48                        | 1.434                     | <b><u>79.4</u></b>          | 0.741 | 0.411  | 0.067          |
| 0.248 | 1.35                | 2.18                  | 16.17                        | 1.452                     | 102                         | 0.787 | 0.378  | 0.056          |

Definitions of  $a_w$ ,  $V$ ,  $n$ ,  $C_s$ ,  $d$ ,  $m$ ,  $x_1$ ,  $\phi$ , and  $\gamma_{\pm}$  are identical to those given in Table S1.

The molality values shown in **\*\*bold and underlined text\*\*** correspond to values directly estimated from Raman spectral deconvolution analysis.

All other molality values were obtained by interpolation based on image-derived droplet volume changes between successive Raman measurements, followed by conversion from molar concentration to molality using the corresponding density values.

The final data point ( $m = 102$  mol kg<sup>-1</sup>) was obtained by extrapolation rather than interpolation. This value lies within the molality range covered by the data in Table S1, and its magnitude is consistent with the corresponding thermodynamic trends observed for the solid-circle data. On this basis, the extrapolated value was considered to be physically reasonable and is included here.
